# Supplementary material for: Morphogenetic forces planar polarize LGN/Pins in the embryonic head during Drosophila gastrulation
Source: eLife. 2022 Jul 7;11:e78779. doi: 10.7554/eLife.78779 (PMC9262390; doi:10.7554/eLife.78779)
Supplement: Supplementary file 1. [file elife-78779-supp1.xlsx]

## Sheet: Sheet1
Stock Nr.	Genotype	Source/Reference
1	Jupiter::GFP	Bloomington Drosophila Stock Center
2	y,w; Sp/Cyo; Utr::GFP, sqh::Ch[a11]/TM3, Sb	This lab
3	w; mat67; ubi-Pins:YFP, Pins[62]/TM6, Tb, Hu	This study, original stock from Chanet et al. 2017
4	mat67; mat15, gap43::mCh	Vasquez et al., 2014
5	OreR	Bloomington Drosophila Stock Center
6	w; mat67, Sqh::Cherry[B1]; GFP::CLIP170/TM3, Sb	This lab
7	w[*]; P{w[+mC]=UAS-ChRFP-Tub}2	Bloomington Drosophila Stock Center
8	UAS-Pins::GFP	Chanet et al. 2017
9	UAS-myrPins::GFP	Chanet et al. 2017
10	y[1] sc[*] v[1]; P{y[+t7.7] v[+t1.8]=TRiP.GL01052}attP2 (Rh3 shRNA control line)	Perkins et al., 2015
11	y[1] sc[*] v[1] sev[21]; P{y[+t7.7] v[+t1.8]=TRiP.HMS00317}attP2 (alpha-catenin shRNA)	Perkins et al., 2015
12	y[1] sc* v[1] sev[21]; P{TRiP.GL00633}attP40 (Cno shRNA line 1)	Perkins et al., 2015
13	y[1] sc* v[1] sev[21]; P{TRiP.HMS00239}attP2 (Cno shRNA line 2)	Perkins et al., 2015
14	y,w; FRT[G13],18w[076]/cyo, Twis::GFP; Toll6[54]95-1, Toll8[89[, spider::GFP/eve::YFP	This study, original stocks from Pare et al. 2014
References:
Chanet, S., R. Sharan, Z. Khan, and A.C. Martin. 2017. Myosin 2-Induced Mitotic Rounding Enables Columnar Epithelial Cells to Interpret Cortical Spindle Positioning Cues. Curr Biol. 27:3350-3358 e3353.
Pare, A.C., A. Vichas, C.T. Fincher, Z. Mirman, D.L. Farrell, A. Mainieri, and J.A. Zallen. 2014. A positional Toll receptor code directs convergent extension in Drosophila. Nature. 515:523-527.
Perkins, L.A., L. Holderbaum, R. Tao, Y. Hu, R. Sopko, K. McCall, D. Yang-Zhou, I. Flockhart, R. Binari, H.-S. Shim, et al. 2015. The Transgenic RNAi Project at Harvard Medical School: resources and validation. Genetics. 201:843–852.
Vasquez, C.G., M. Tworoger, and A.C. Martin. 2014. Dynamic myosin phosphorylation regulates contractile pulses and tissue integrity during epithelial morphogenesis. J. Cell Biol. 206:435–450.
Figure	Cross (virgin x male) or stock	Comments
1B, D	1
1C	2
2A-B, H-I	8x4
2E-G	5
3A-B, E-F	8x3
3G, K	8x6
3I, M	9x6
4A	10x6
4C	11x6
4E	12x6
5A	10x3
5C	11x3
6A-B, E-F, J-K	8x3
7A-B, E-F	8x3
S1A, C	8x4
S2A-B	10x2
S3A, C	9x4
S5A,C	1
F2 embryos imaged from these crosses, using above stock numbers/genotypes.
Non-balancer females were collected and used for cages at 25°C unless otherwise indicated.
